# Supplementary material
Source: HighWire-hosted journal article supplement (https://gut.bmj.com/content/70/4/677)
Supplement: inline-supplementary-material-2 [file inline-supplementary-material-2.pdf]

## UC effectiveness by year of starting thiopurine

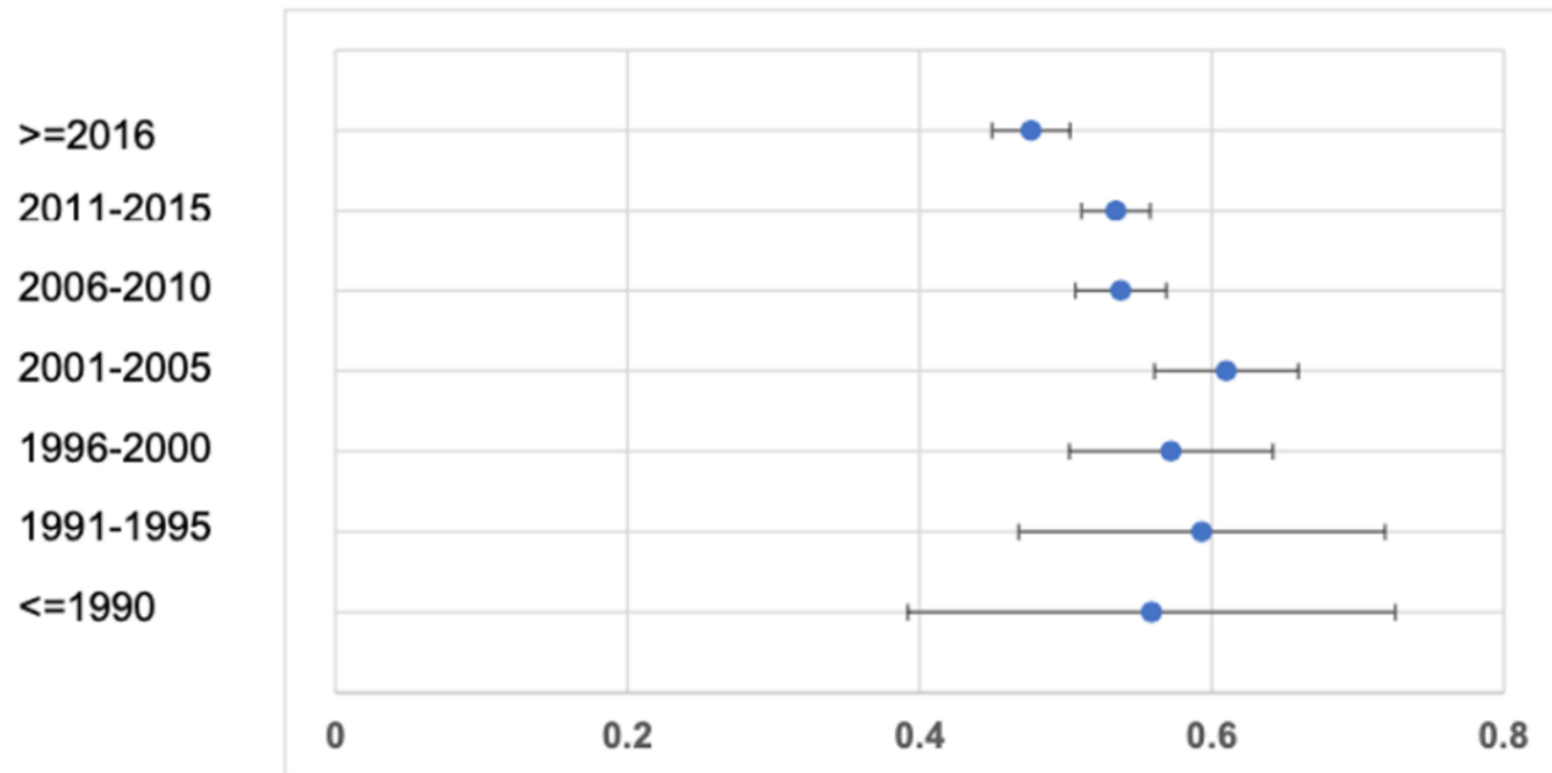

**Supplementary Figure 2.** Proportion of UC patients in whom thiopurine monotherapy was deemed effective, stratified by period of starting treatment
