# Supplementary material
Source: HighWire-hosted journal article supplement (https://gut.bmj.com/content/70/4/677)
Supplement: inline-supplementary-material-3 [file inline-supplementary-material-3.pdf]

### Crohn's effectiveness by year of starting thiopurine

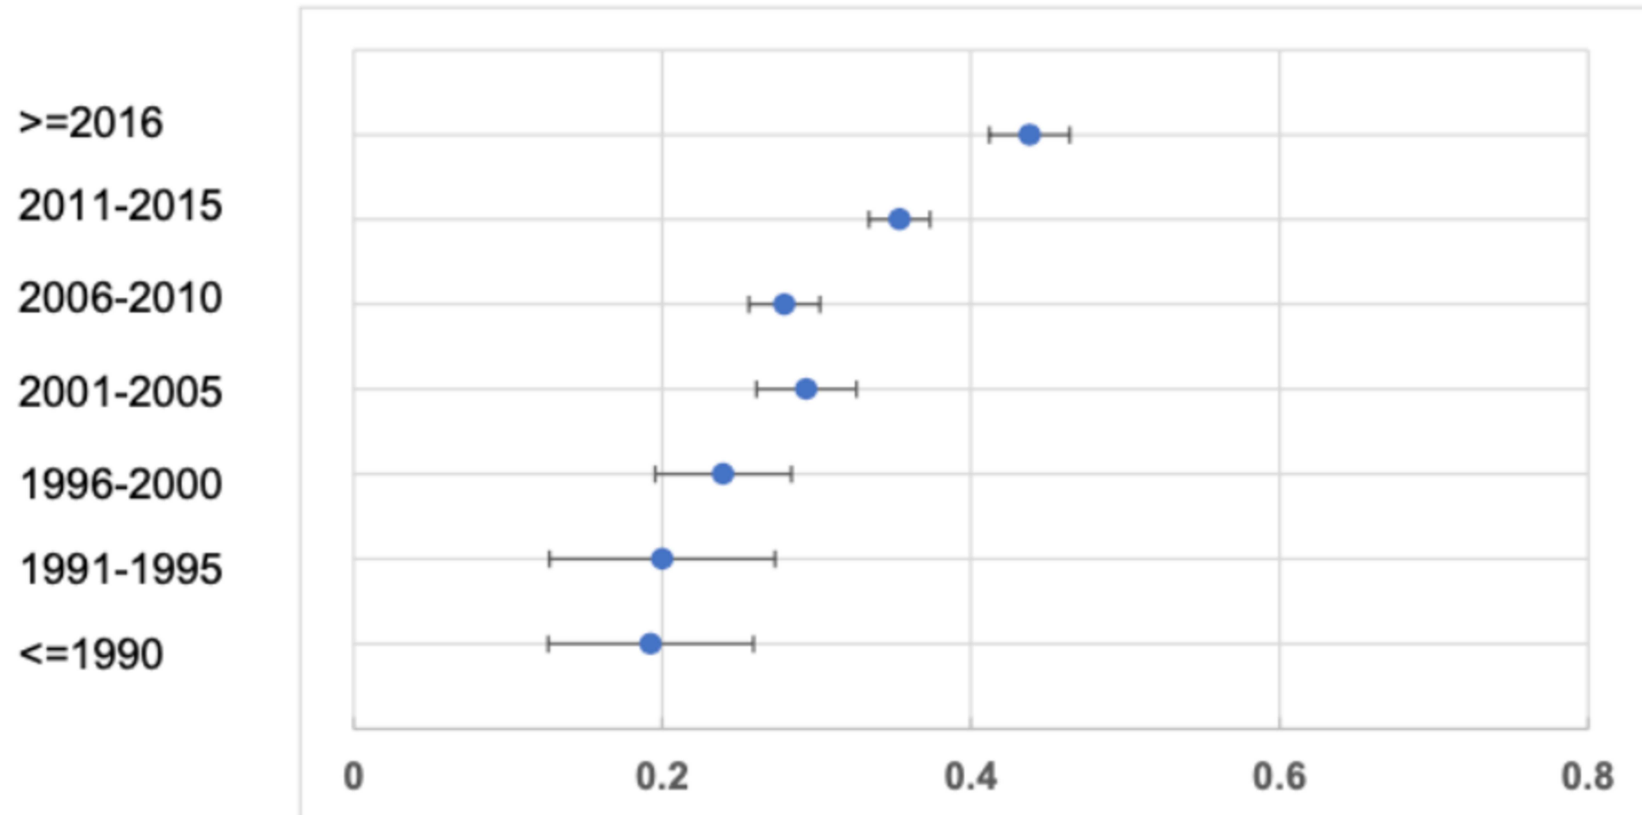

**Supplementary Figure 3.** Proportion of CD patients in whom thiopurine monotherapy was deemed effective, stratified by period of starting treatment
