# Supplementary material
Source: HighWire-hosted journal article supplement (https://gut.bmj.com/content/70/4/677)
Supplement: inline-supplementary-material-4 [file inline-supplementary-material-4.pdf]

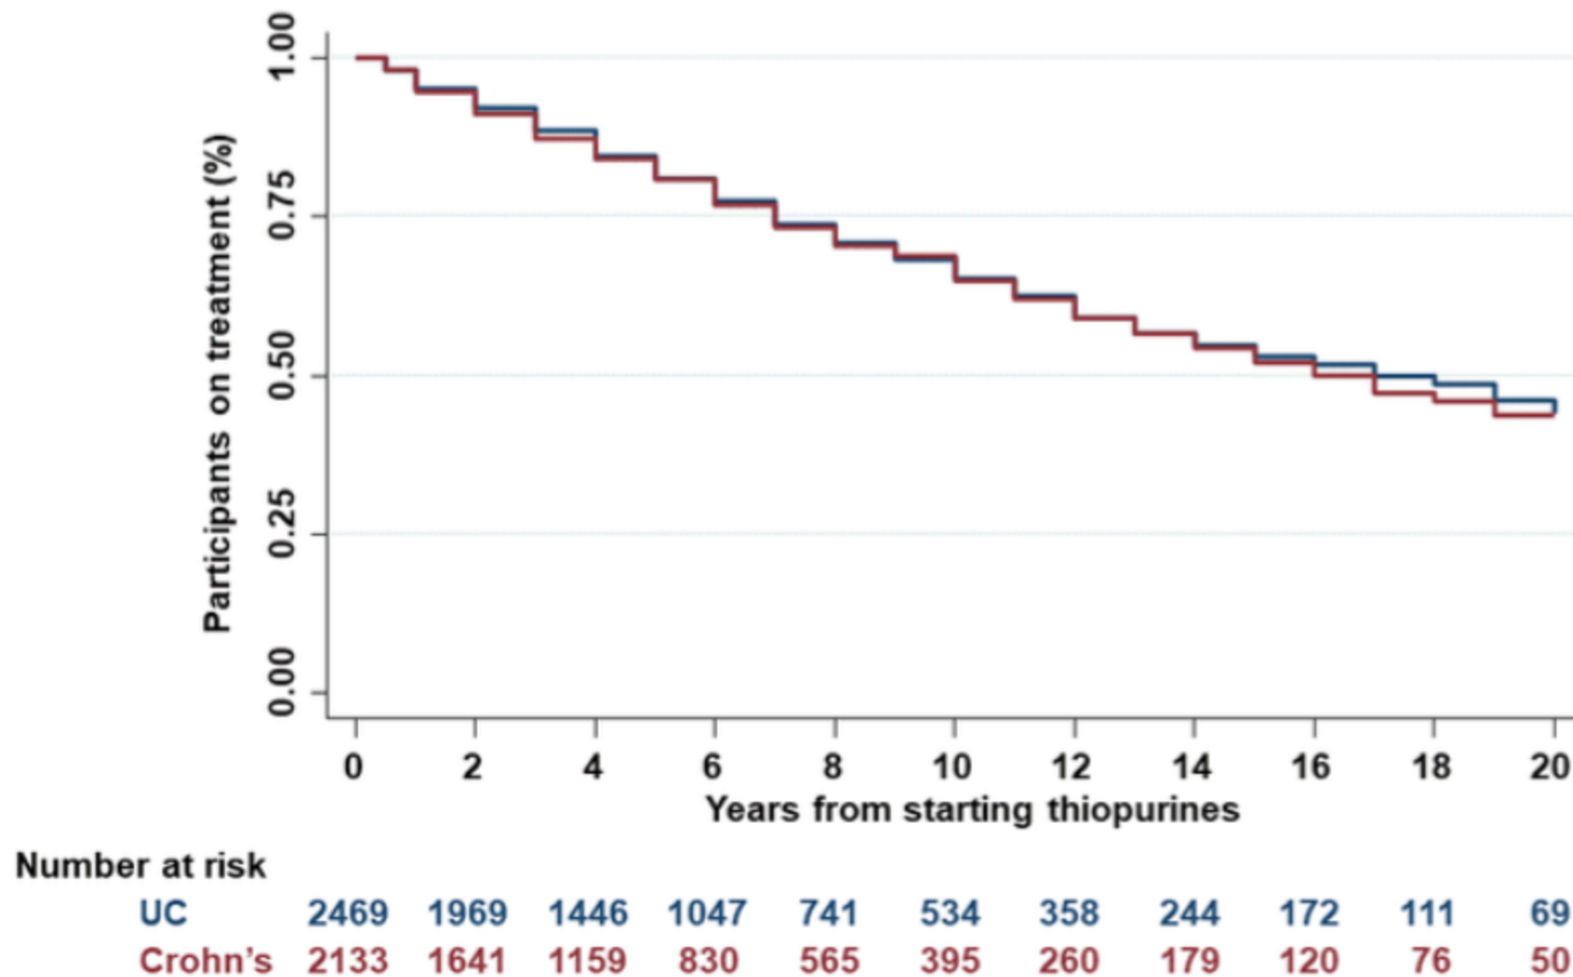

**Supplementary Figure 4.** Kaplan-Meier plot showing duration of thiopurine treatment in patients in whom thiopurine monotherapy was deemed effective. Median is 17 years (95%CI=15-20) for UC and 16 years (95% CI=16-20) for CD.
