# Supplementary material
Source: HighWire-hosted journal article supplement (https://gut.bmj.com/content/70/4/677)
Supplement: inline-supplementary-material-5 [file inline-supplementary-material-5.pdf]

**Supplementary table 1.** Percentage (%) of patients not requiring surgery/biologics at 1,2,3,5,10,15,20 years after diagnosis.

|                                                                                                               |             | Crohn's  | UC          |
|---------------------------------------------------------------------------------------------------------------|-------------|----------|-------------|
| <b>All patients</b>                                                                                           |             | N=6464   | N=4725      |
| <b>Median time (years) without treatment escalation (biologics or surgery) (95%CI)</b>                        |             | 4 (4, 5) | 12 (11, 13) |
| <b>P25, P75</b>                                                                                               |             | 1, 12    | 2, 30       |
| <b>Percentage of patients without treatment escalation after N years of thiopurine monotherapy initiation</b> | <b>N=1</b>  | 69%      | 76%         |
|                                                                                                               | <b>N=2</b>  | 60%      | 72%         |
|                                                                                                               | <b>N=3</b>  | 54%      | 69%         |
|                                                                                                               | <b>N=5</b>  | 45%      | 64%         |
|                                                                                                               | <b>N=10</b> | 29%      | 53%         |
|                                                                                                               | <b>N=15</b> | 19%      | 43%         |
|                                                                                                               | <b>N=20</b> | 13%      | 37%         |
